# Supplementary material
Source: HighWire-hosted journal article supplement (https://bmjopen.bmj.com/content/7/10/e017902)
Supplement: inline-supplementary-material-1 [file inline-supplementary-material-1.pdf]

## **Appendix: Search strategy for Medline/Ovid**

1. exp "appointments and schedules"/
2. "referral and consultation"/
3. office visits/
4. appointment?.tw.
5. consult\*.tw.
6. or/1-5
7. exp time factors/
8. time management/
9. quality of health care/
10. (time or length or duration or short or lengthen or longer or interval\*).tw.
11. or/7-10
12. family practice/
13. general practice/
14. physicians, family/
15. physicians, primary care/
16. general practitioners/
17. primary health care/
18. ((general or family) adj practi\*).tw.
19. family physic\*.tw.
20. primary care.tw.
21. primary health care.tw.
22. or/12-21
23. 6 and 11 and 22
